# Supplementary material for: Acetylcholine prioritises direct synaptic inputs from entorhinal cortex to CA1 by differential modulation of feedforward inhibitory circuits
Source: Nat Commun. 2021 Sep 16;12:5475. doi: 10.1038/s41467-021-25280-5 (PMC8445995; doi:10.1038/s41467-021-25280-5)
Supplement: Supplementary file 1 — Supplementary Information [file 41467_2021_25280_MOESM1_ESM.pdf]

**Figure S1**

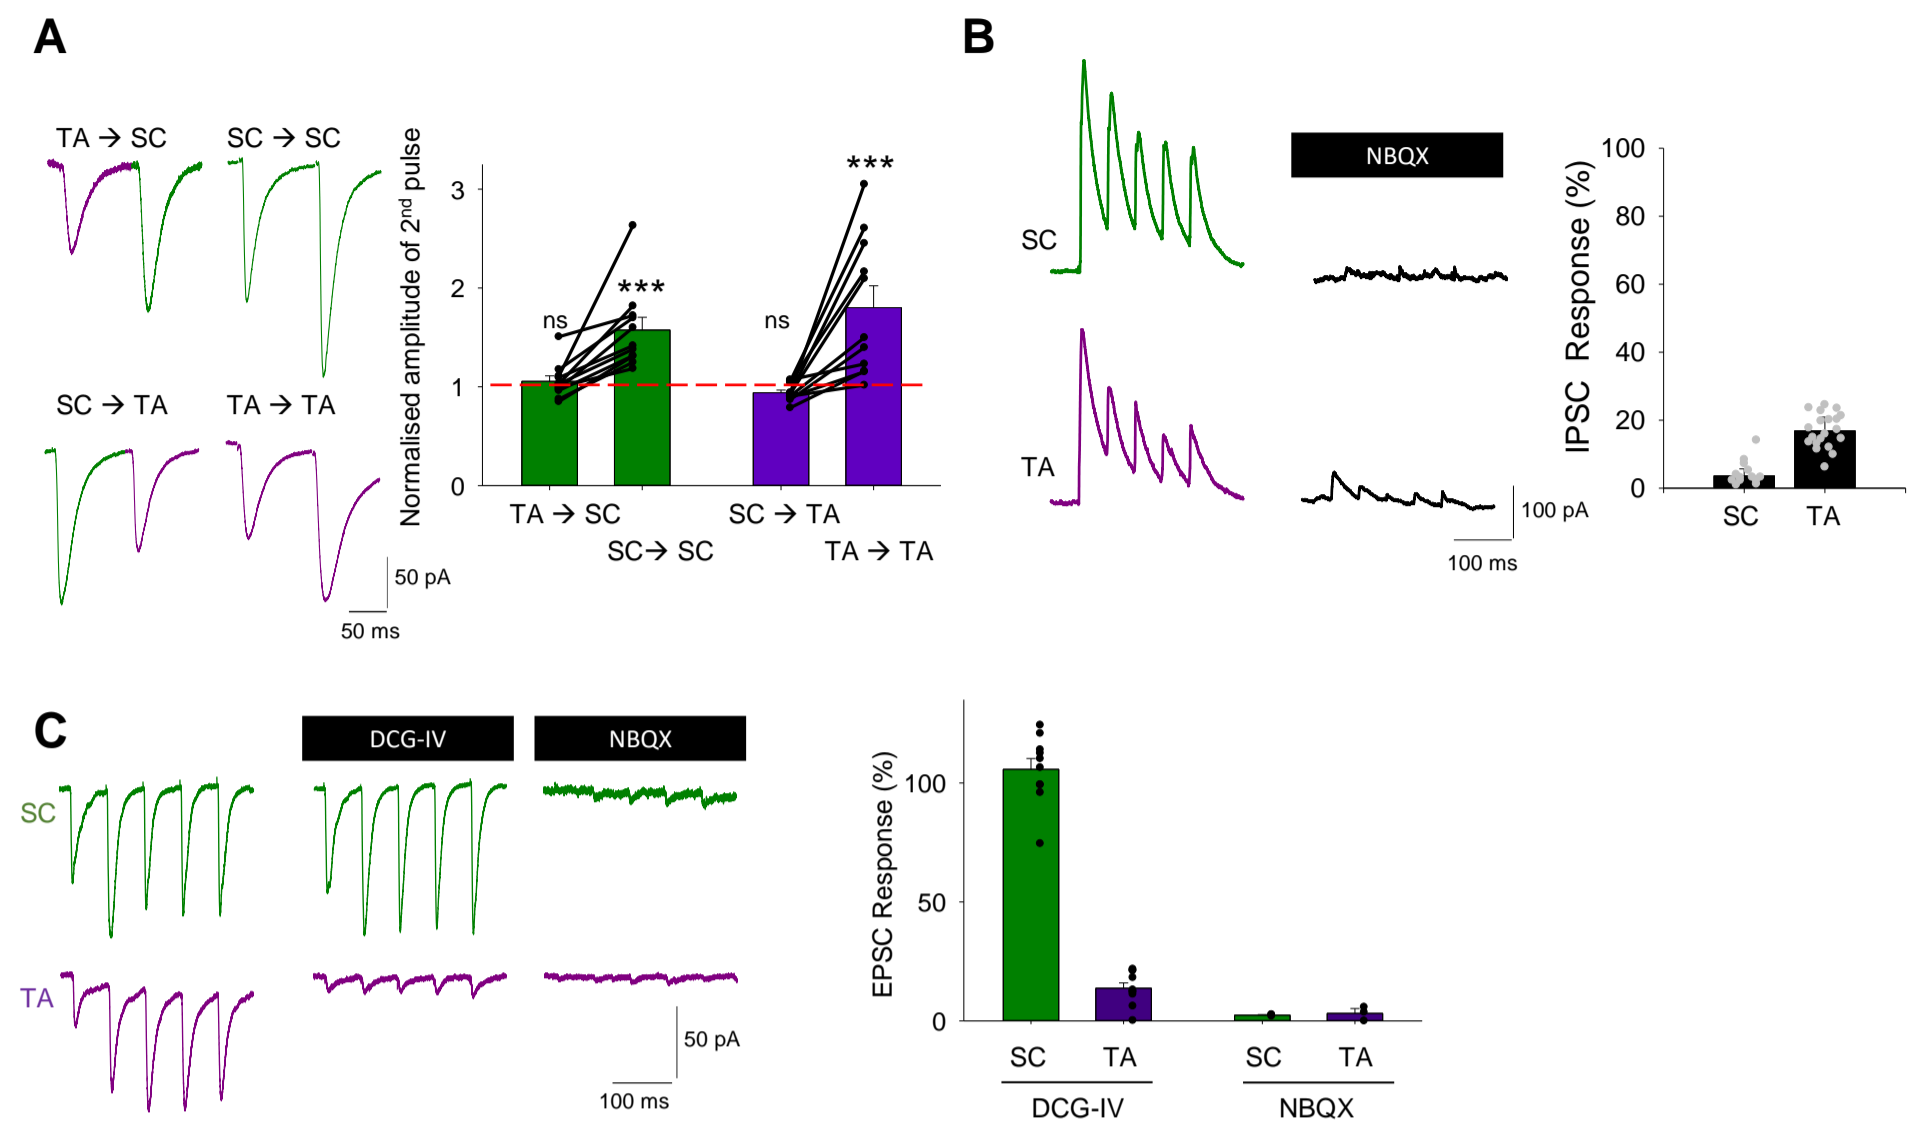

**A**, Independence of SC (green) and TA (purple) pathways was evaluated by the lack of facilitation of the second EPSC response when the alternate pathway was stimulated ( $n = 11$ ; TA – SC,  $p = 0.06$ ; SC – SC,  $p = 0.0005$ ; SC – TA,  $p = 0.34$ ; TA – TA,  $p = 0.0009$ ).

**B**, Feedforward IPSCs from SC and TA pathways were recorded at 0 mV and confirmed to be disynaptic by sensitivity to NBQX.

**C**, DCG-IV ( $3 \mu\text{M}$ ) blocked TA pathway but not SC pathway synaptic responses. Application of AMPA receptor antagonist (NBQX  $20 \mu\text{M}$ ) blocked responses in both pathways.

Data are mean  $\pm$  SEM; Two tailed paired  $t$ -Test. \*\*\* $p < 0.001$ .

**Figure S2**

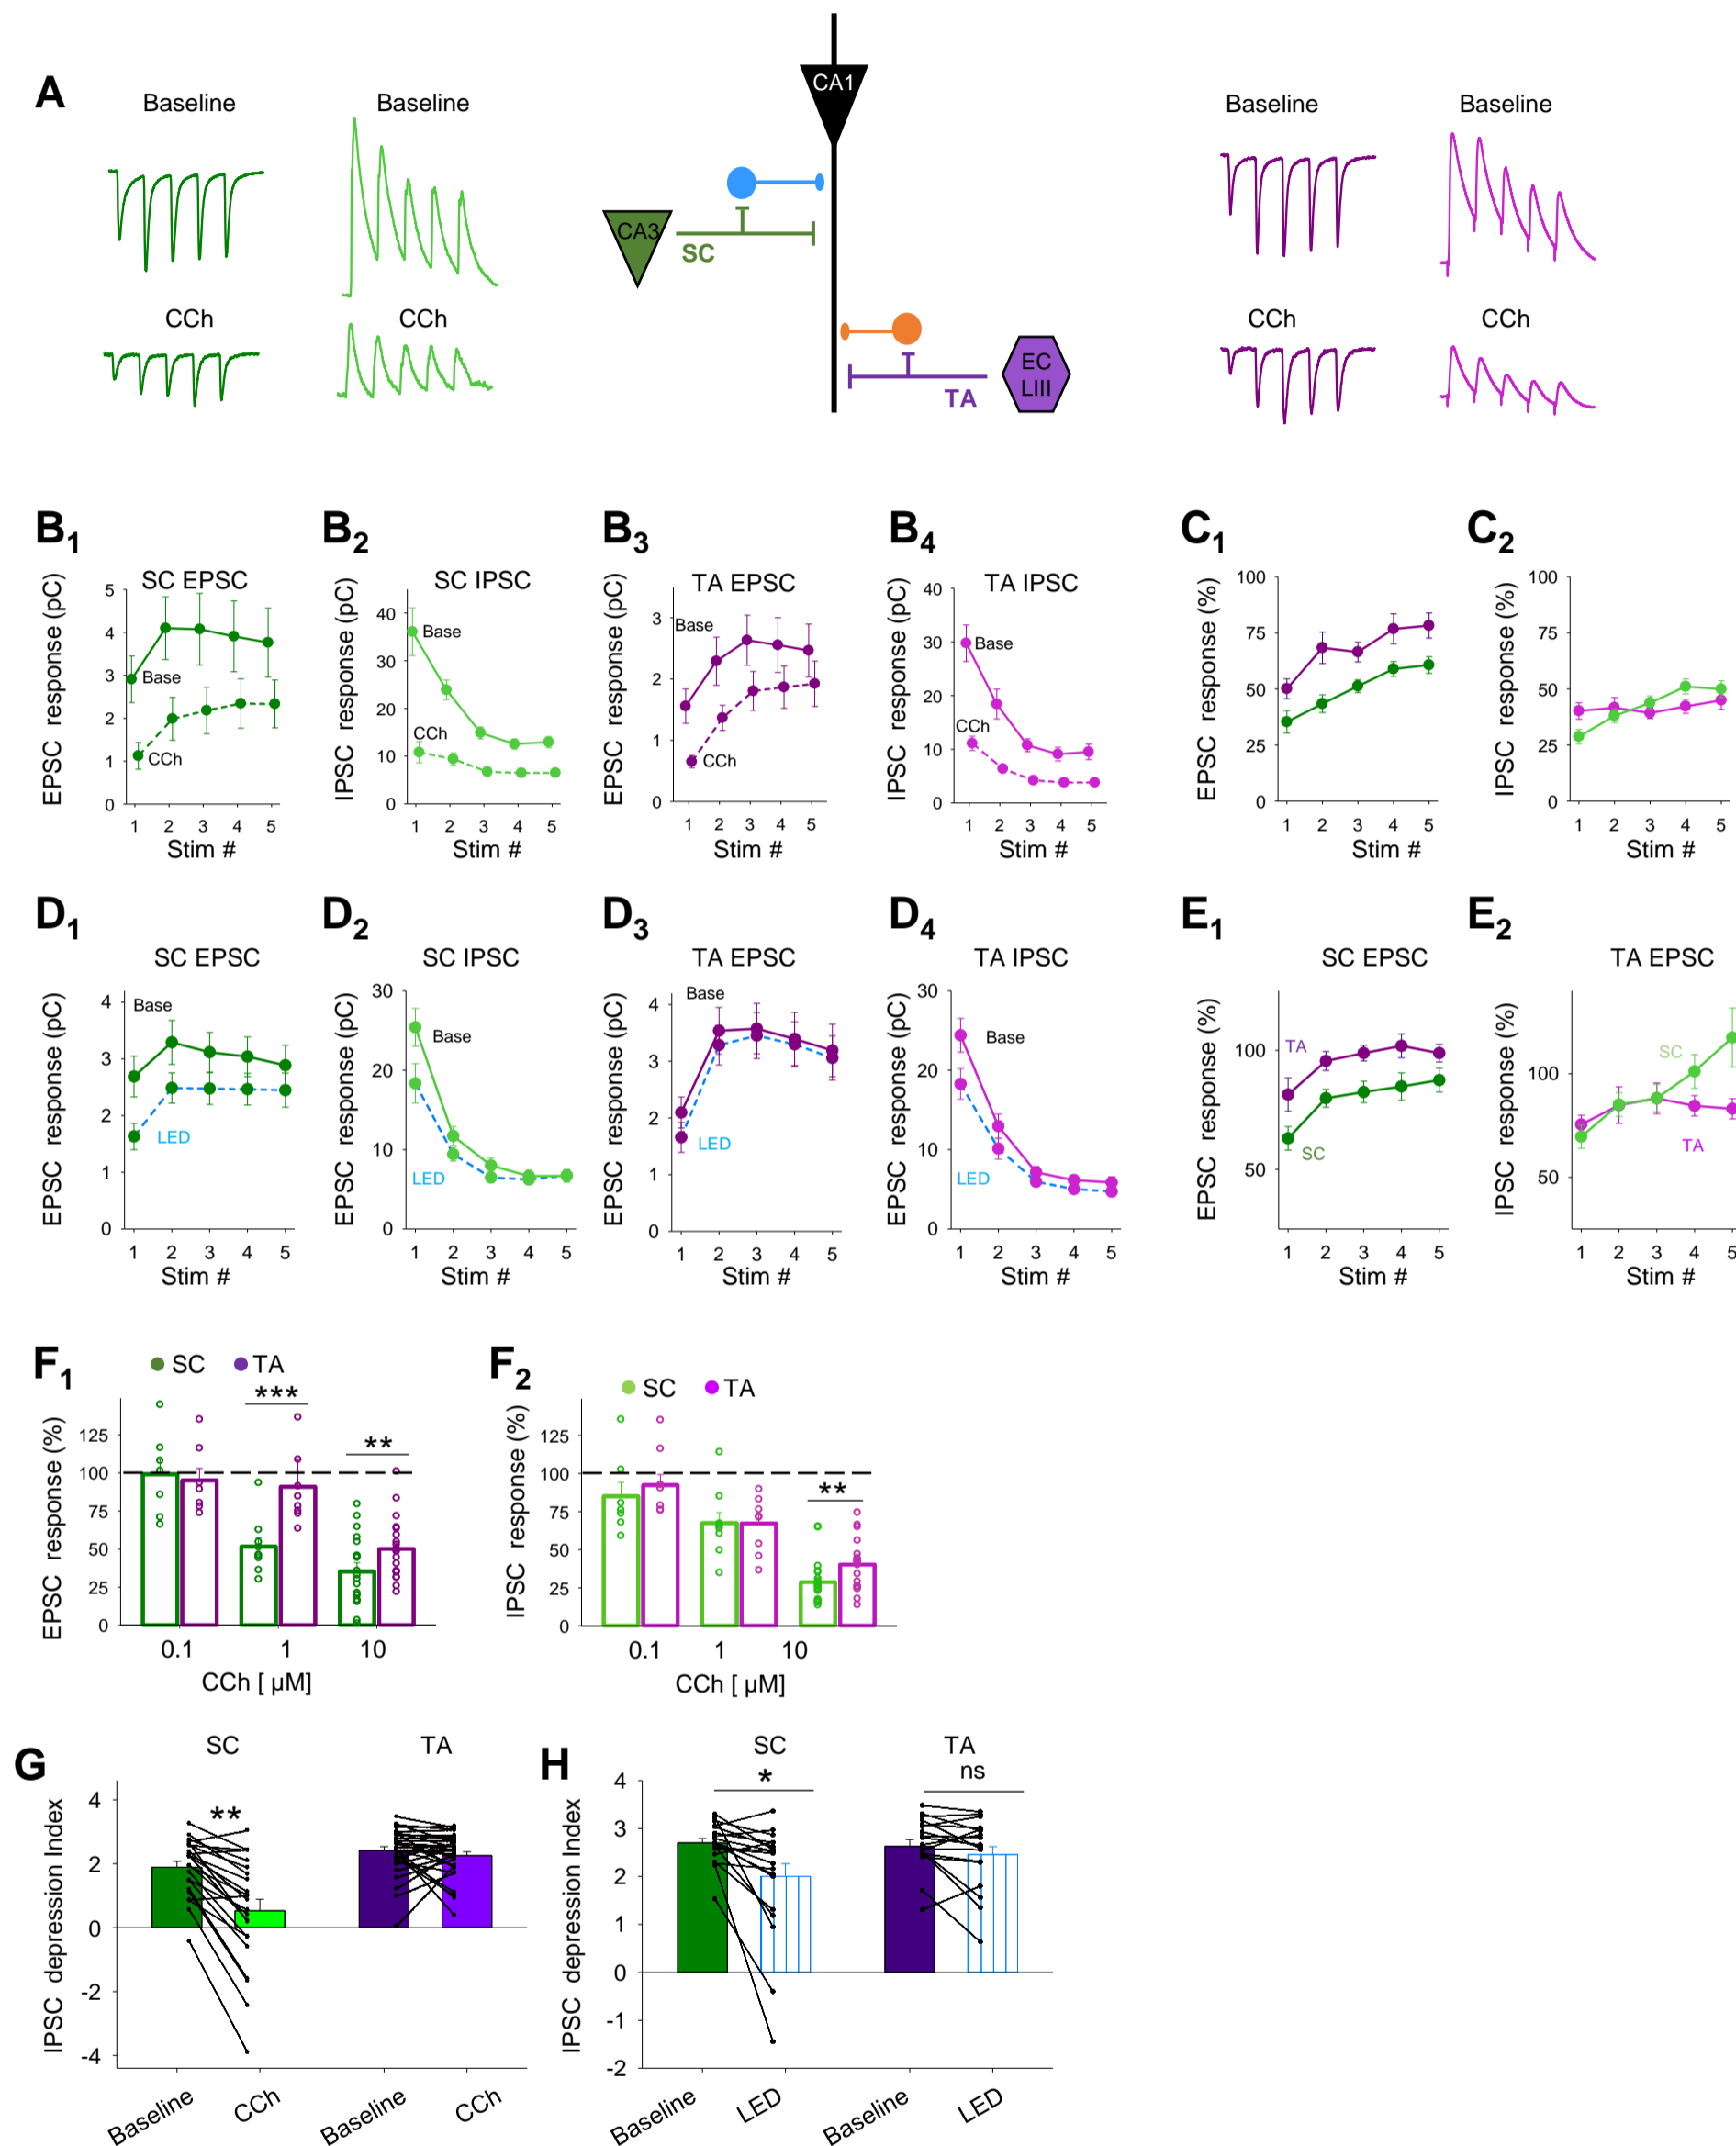

Figure S3

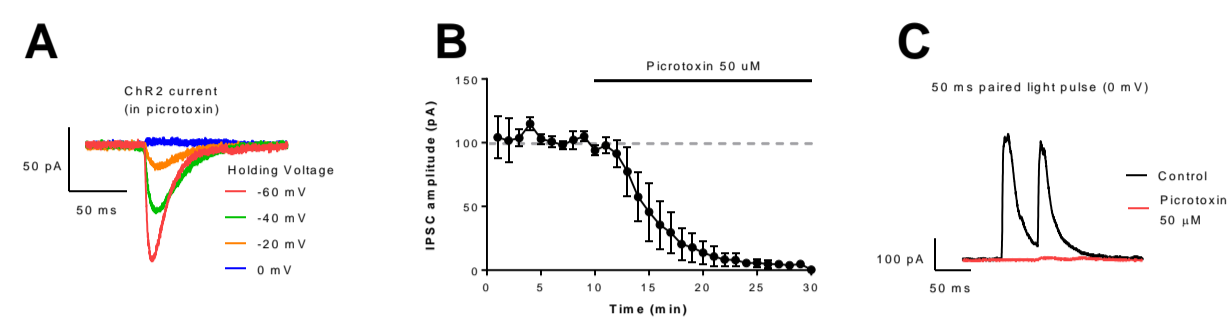

**A**, ChR2 currents at different holding potentials recorded from a CCK<sup>+</sup> and ChR2 expressing pyramidal neuron in response to 2ms light pulses in the presence of picrotoxin (50  $\mu$ M). At 0mV (the reversal potential for ChR2) no ChR2 currents are observed.

**B-C**, Light evoked GABAergic responses recorded from pyramidal neurons held at 0mV in the presence of NBQX and DAPV are abolished by picrotoxin (50  $\mu$ M).

Data are mean  $\pm$  SEM.

**Figure S4**

| <div>Compound 1</div> <div>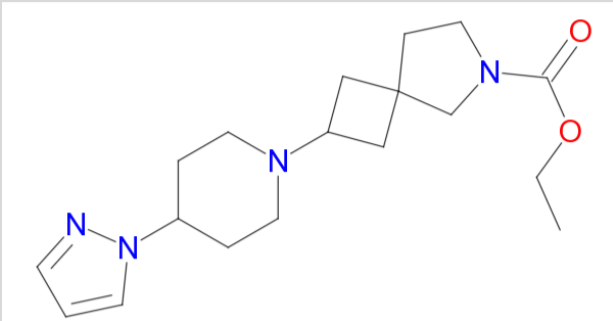</div> |                      |                |
|---------------------------------------------------------------------------------------------------------------------|----------------------|----------------|
| Parameter                                                                                                           | Value <sup>b,c</sup> | N <sup>e</sup> |
| MWt                                                                                                                 | 332.44               |                |
| cLogP / LogD <sup>a</sup>                                                                                           | 1.4 / 1.7            |                |
| hM <sub>1</sub> pEC50 (Emax)                                                                                        | 7.5 ± 0.33 (108)     | 16             |
| hM <sub>2</sub> pEC50 (Emax)                                                                                        | 6.3 ± 0.97 (41)      | 5              |
| hM <sub>3</sub> pEC50 (Emax)                                                                                        | <4.7                 | 3              |
| hM <sub>4</sub> pEC50 (Emax)                                                                                        | 8.4 ± 0.25 (112)     | 16             |
| rM <sub>4</sub> pEC50 (Emax)                                                                                        | 7.6 ± 0.14 (59)      | 5              |
| hM <sub>2</sub> pKi <sup>d</sup>                                                                                    | 6.0 ± 0.23           | 4              |

Structure and in vitro pharmacological profile of Compound 1. CHO-K1 cells stably expressing the human M<sub>1</sub>–M<sub>4</sub> and rat M<sub>4</sub> receptors were used to determine the pharmacological profile of Compound 1. <sup>a</sup> Calculated LogP value, LogD was measured at pH7.4. <sup>b</sup> Compound pEC50 values were measured using phosphor-ERK format (CisBio). Values reported as <4.7 were considered inactive and did not induce a >10% increase in the response at the highest concentration tested (30μM). <sup>c</sup> The maximum efficacy (Emax values) are expressed as a percentage of the response of a saturating concentration of acetylcholine (1μM) run in the same assay. <sup>d</sup> [3H]-NMS competition binding studies were used to define the affinity (pKi) for Compound 1 at the human muscarinic M<sub>2</sub> receptor. <sup>e</sup> number of replicates. Data are the mean ± S.E.M. Compound 1 can be found within WO2015/118342 which relates to the invention of agonists of the muscarinic M<sub>1</sub> receptor and/or M<sub>4</sub> receptor and which are useful in the treatment of muscarinic M<sub>1</sub>/M<sub>4</sub> receptor mediated diseases.

**Figure S5**

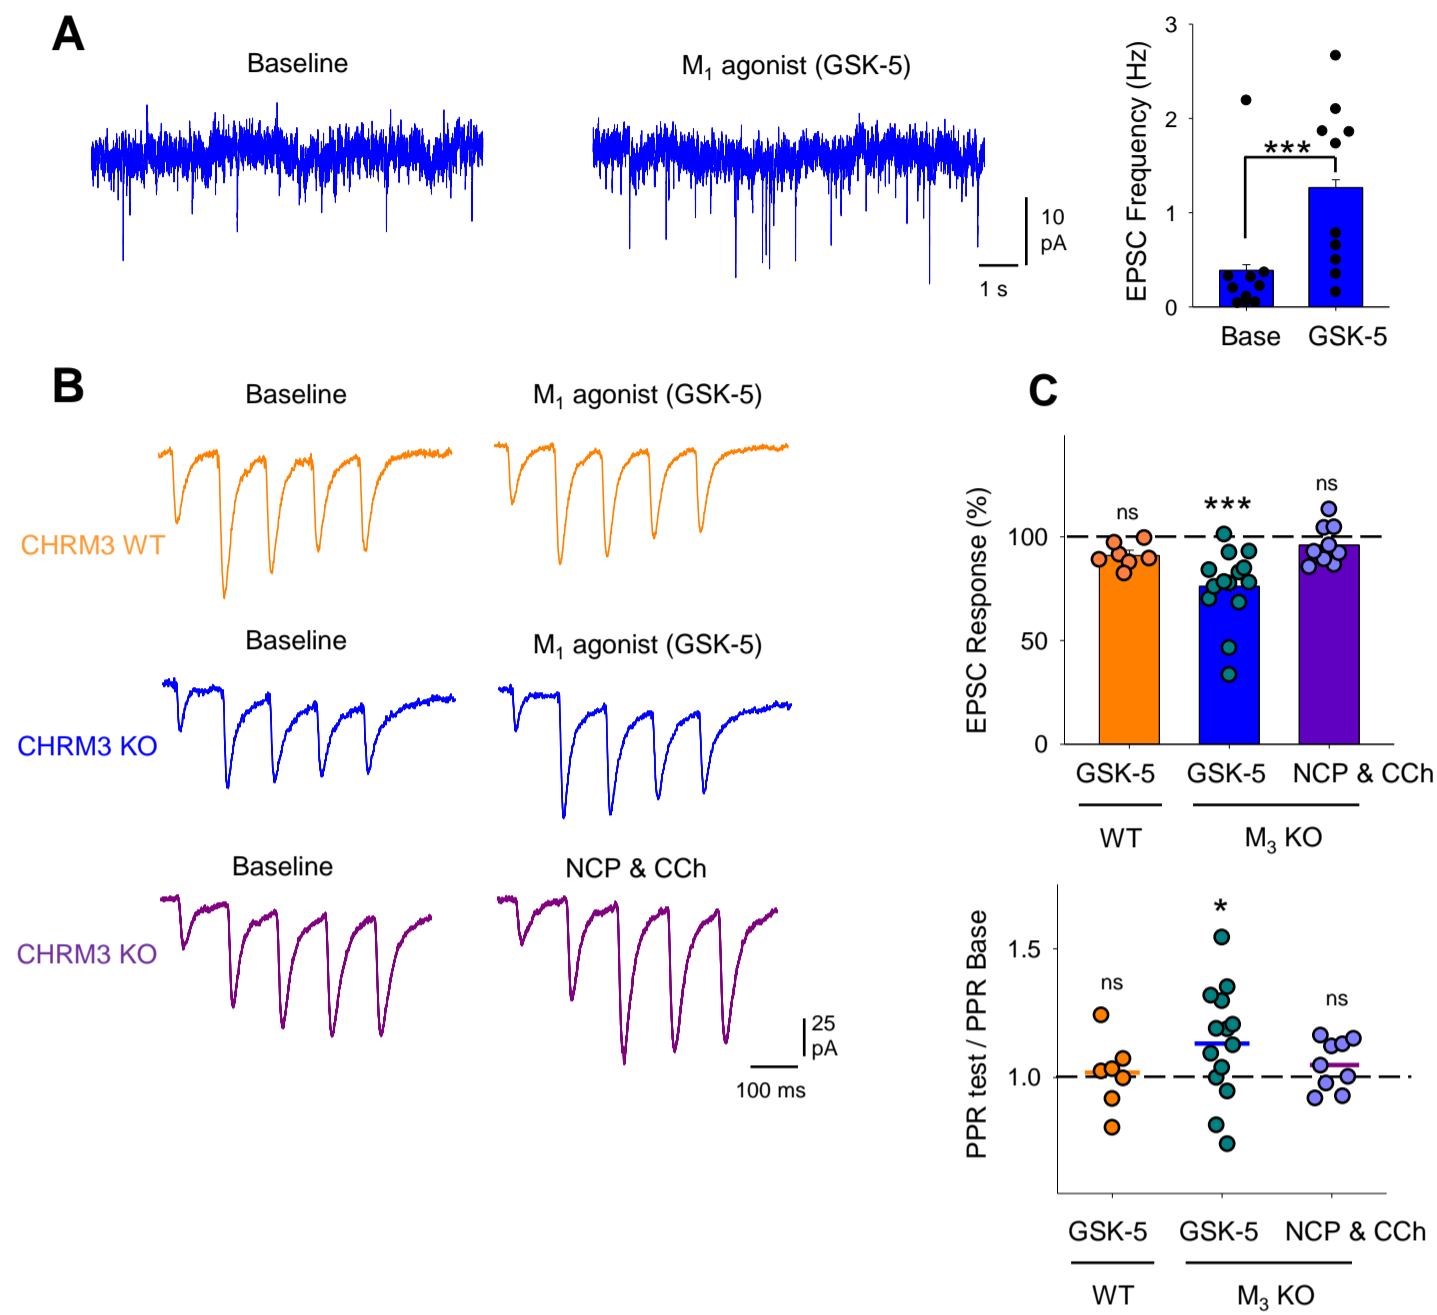

**A**, Muscarinic M<sub>1</sub> receptor agonist (GSK-5, 500nM) produced an increase in the frequency of spontaneous excitatory events recorded from CA1 pyramidal neurons (n = 10, p = 0.0008).

**B-C**, GSK-5 caused a reduction of TA pathway EPSC (B) and an increase of PPR (C) in slices from CHRM3 KO mice but not in slices from CHRM3 WT mice. Nitrocaramiphen (1  $\mu$ M) prevented the reduction in TA pathway EPSC (B) and increase in PPR (C) caused by carbachol in slices from CHRM3 KO mice (WT GSK-5 EPSC, n = 7, p = 0.122; WT GSK-5 PPR, p = 0.81; M3 KO GSK-5 EPSC, n = 14, p = 0.0001; M3 KO GSK-5 PPR, p = 0.039; M3 KO CCh + NCP EPSC, n = 9, p = 0.242; M3 KO CCh + NCP PPR, p = 0.168).

Data are mean  $\pm$  SEM; Comparisons by two tailed paired *t*-tests \*\*\* p < 0.001 \* p < 0.05.

**Figure S6**

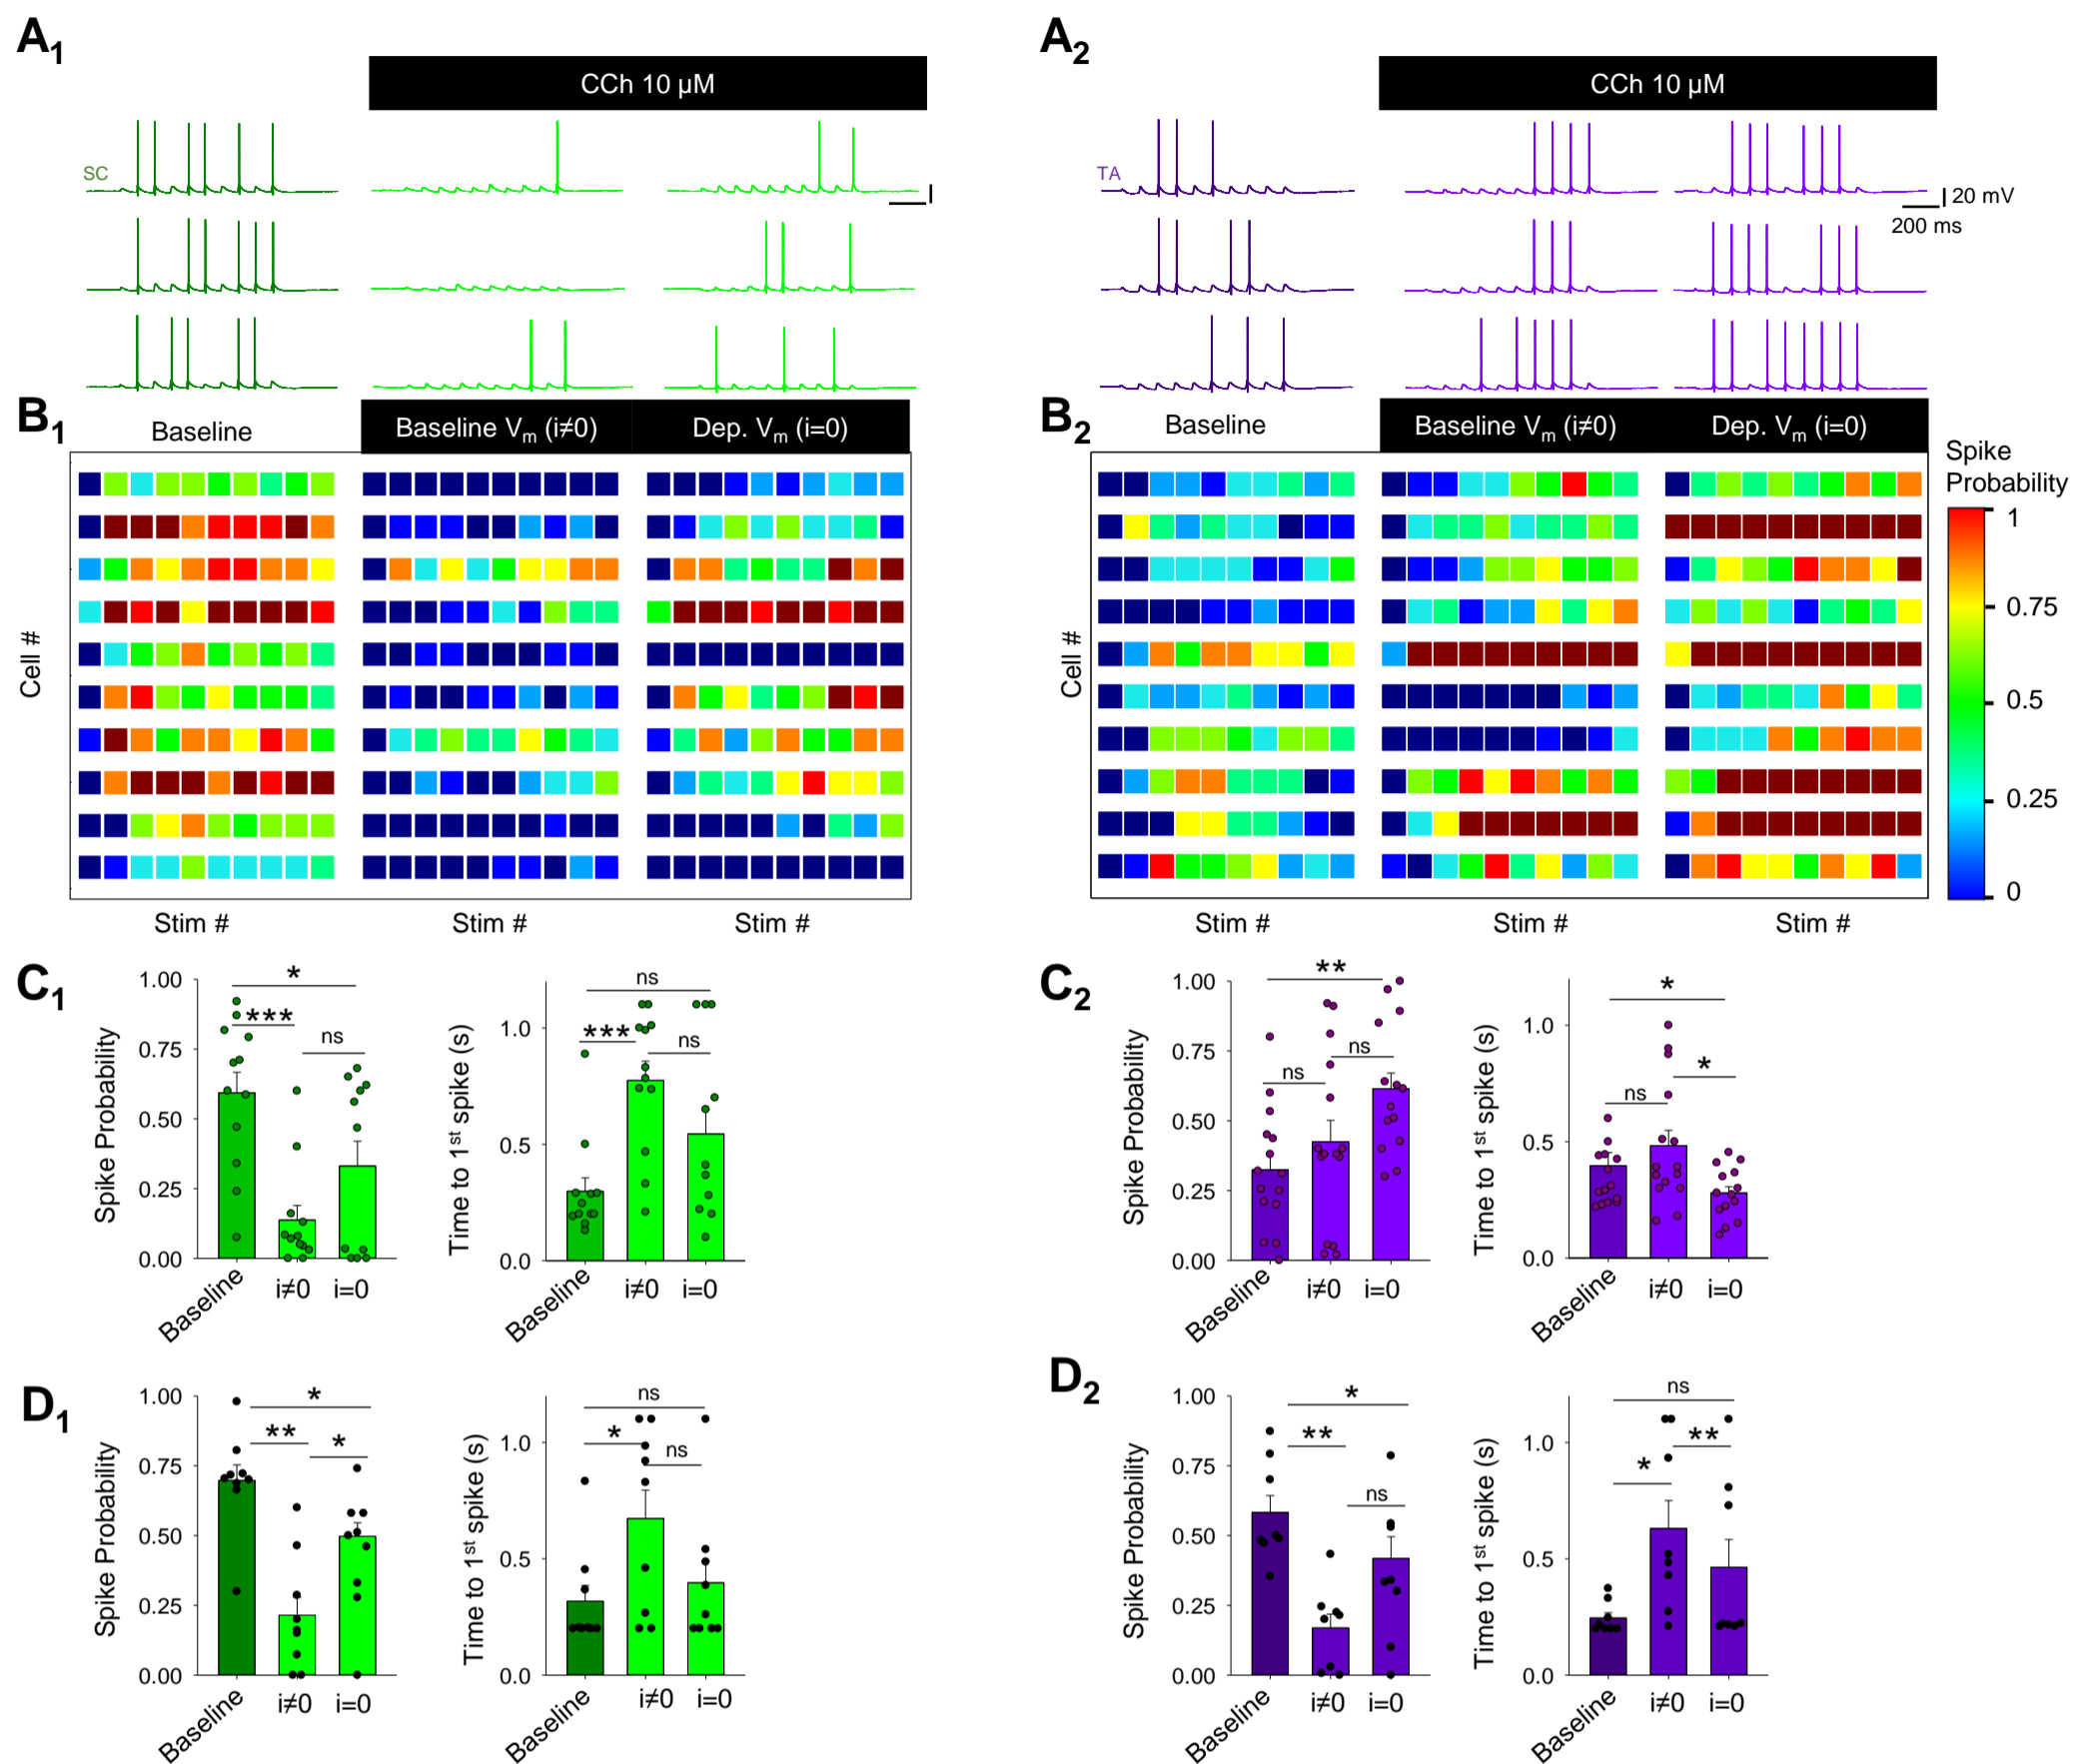

**A**, Responses in CA1 pyramidal neurons to 10 stimuli at 10 Hz given to Schaffer collateral (SC, A<sub>1</sub>) or temporoammonic (TA, A<sub>2</sub>) input pathways. After application of CCh (10 μM), membrane potential (V<sub>m</sub>) is initially held at baseline levels by injection of current (i≠0) and then allowed to depolarise (i=0).

**B**, Heat maps depicting spike probability for 10 stimulation pulses from 10 cells for SC (B<sub>1</sub>) and TA (B<sub>2</sub>) input pathways before and during CCh application.

**C**, Spike probability and time to first spike for SC (C<sub>1</sub>; n = 20 from 11 mice; spike probability I ≠ 0, p < 0.0001; spike probability I = 0, p = 0.024; I ≠ 0 vs I = 0, p = 0.052; time to first spike I ≠ 0, p < 0.0001; time to first spike I = 0, p = 0.077; I ≠ 0 vs I = 0, p = 0.087) and TA (C<sub>2</sub>; n = 20 from 11 mice; spike probability I ≠ 0, p = 0.162; spike probability I = 0, p = 0.002; I ≠ 0 vs I = 0, p = 0.064; time to first spike I ≠ 0, p = 0.087; time to first spike I = 0, p = 0.031; I ≠ 0 vs I = 0, p = 0.017) input pathways. Spike probability decreased after CCh application in SC pathway but increased in TA pathway.

**D**, In the presence of GABA<sub>A</sub> receptor antagonist, CCh reduced spike probability and increased time to spike in both SC (D<sub>1</sub>; n = 20 from 11 mice; spike probability I ≠ 0, p = 0.003; spike probability I = 0, p = 0.024; I ≠ 0 vs I = 0, p = 0.032; time to first spike I ≠ 0, p = 0.023; time to first spike I = 0, p = 0.077; I ≠ 0 vs I = 0, p = 0.067) and TA (D<sub>2</sub>; n = 20 from 11 mice; spike probability I ≠ 0, p = 0.004; spike probability I = 0, p = 0.024; I ≠ 0 vs I = 0, p = 0.162; time to first spike I ≠ 0, p = 0.011; time to first spike I = 0, p = 0.091; I ≠ 0 vs I = 0, p = 0.007) input pathways.

Data are mean ± SEM; Comparisons by one-way ANOVA with repeated measures and post hoc Bonferroni correction \*\*\* p < 0.001 \*\*p < 0.01 \* p < 0.05.

Figure S7

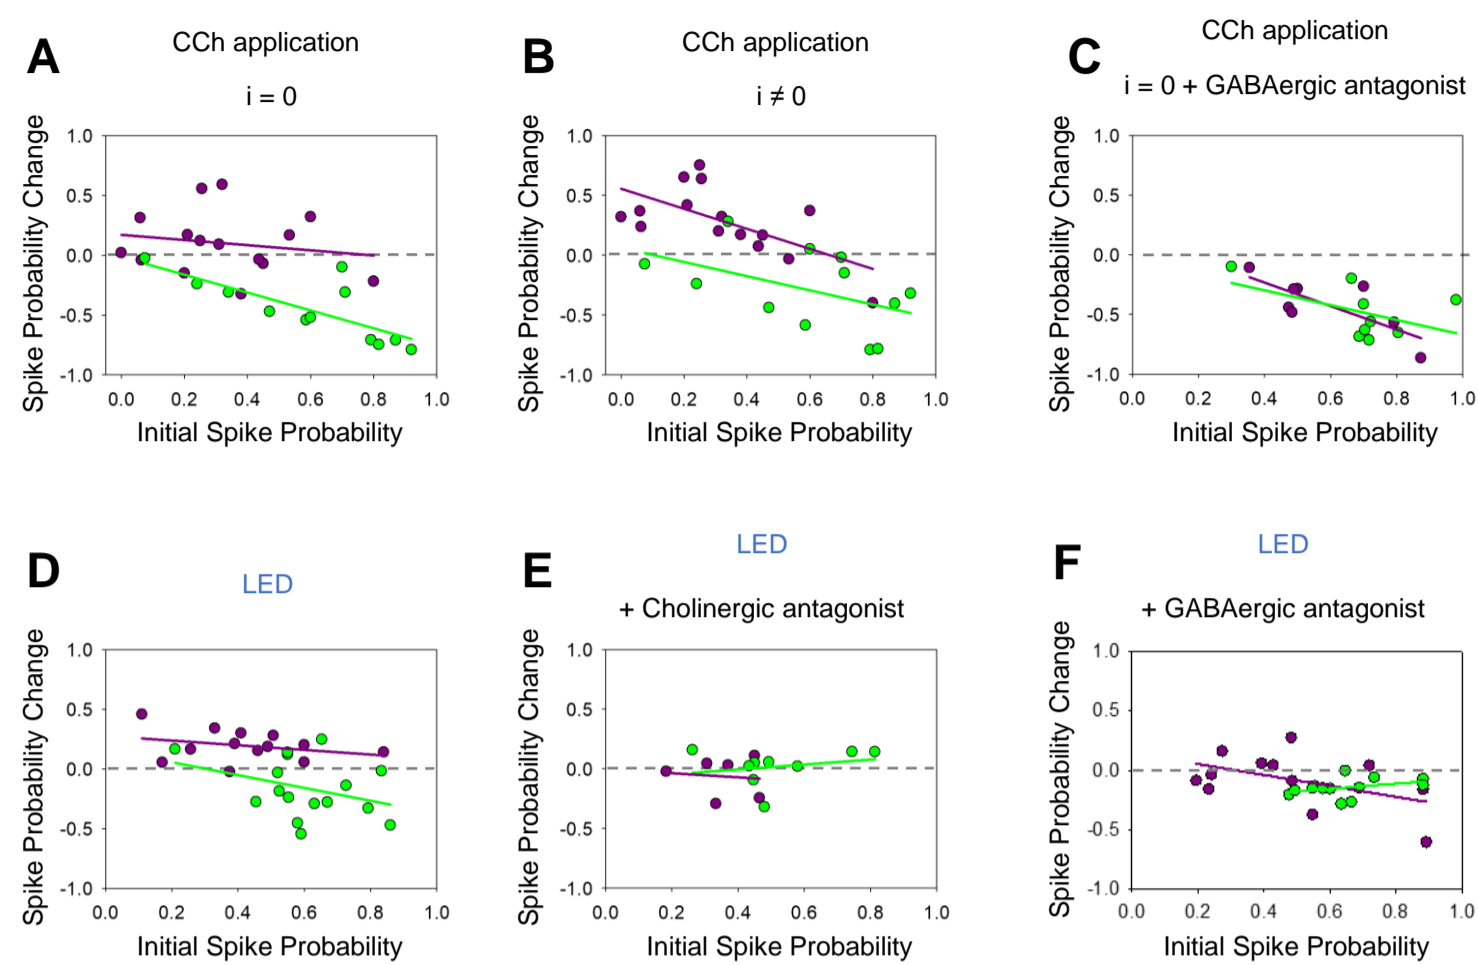

A-F, Spike probability changes correlated with the initial spike probability for each pathway (SC green and TA purple) in each experimental condition (A-C, related to Figure S6; D-E, related to Figure 6; F, related to Figure 7). Linear regression trend is shown as solid line for each pathway.

Figure S8

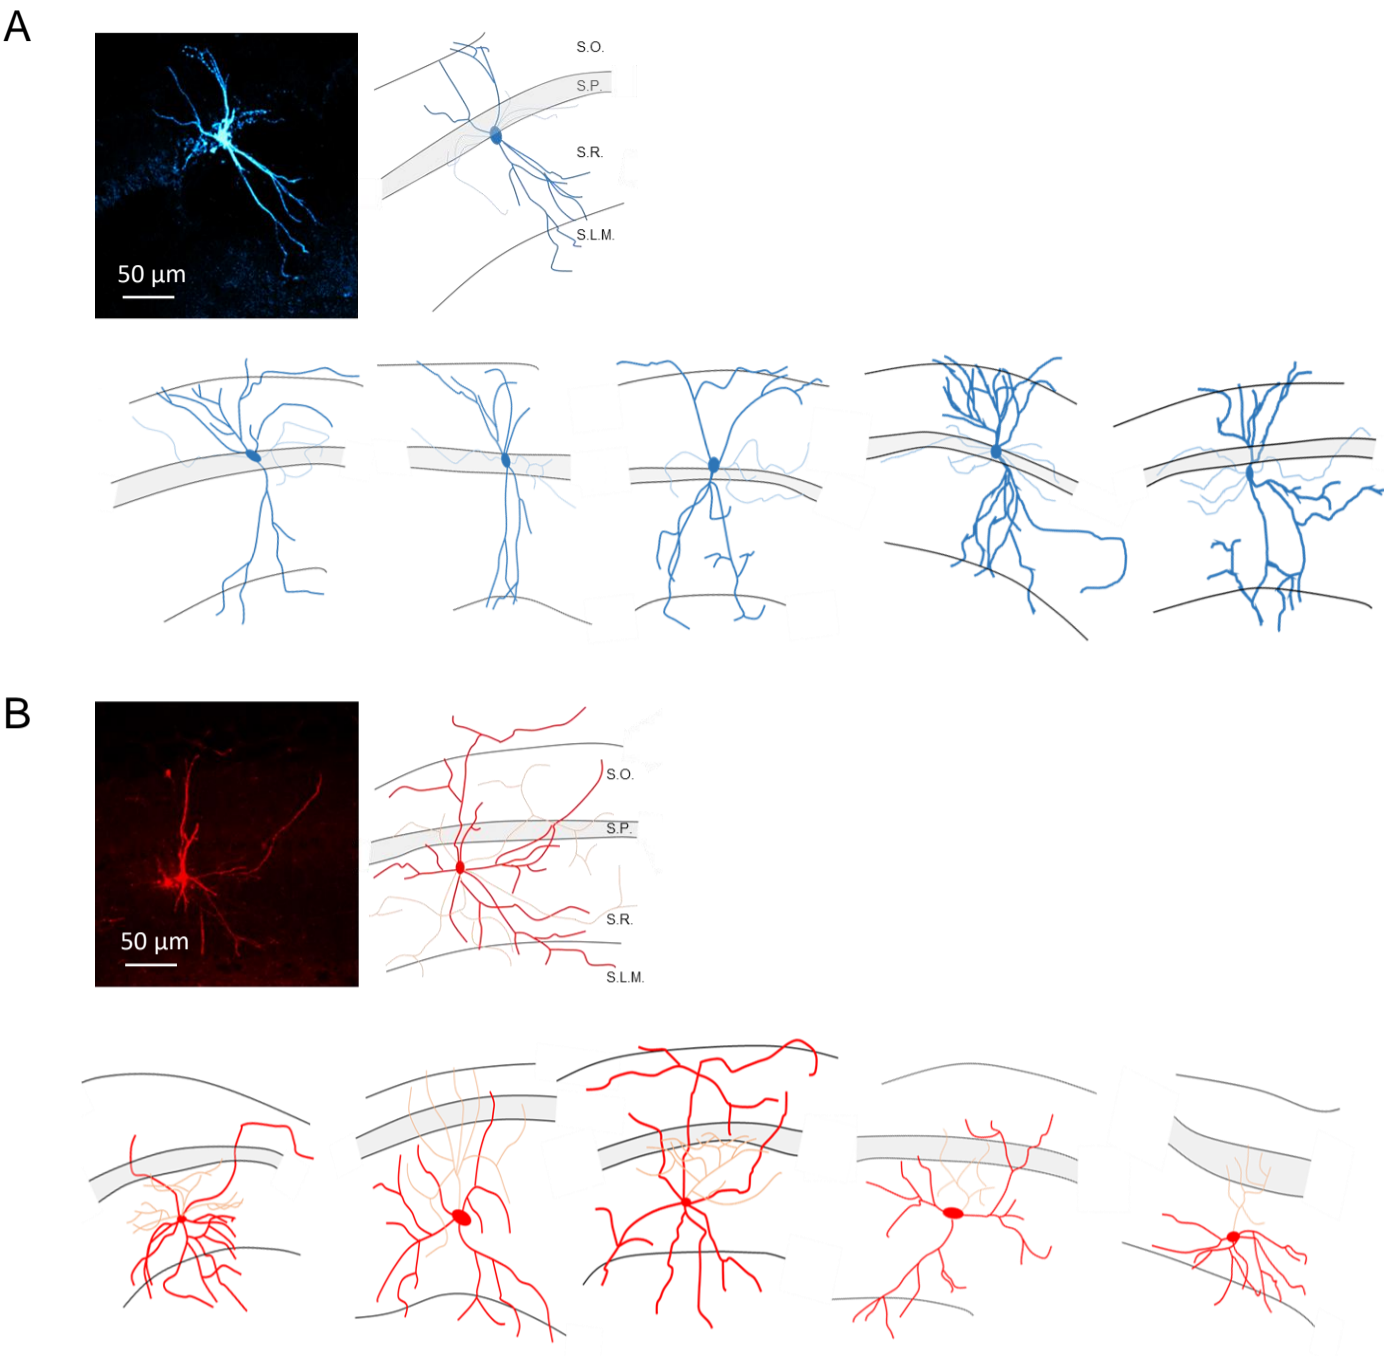

**A-B**, Images of 6 neurolucida-traced PV (A) or CCK (B) expressing interneurons filled with neurobiotin and co-immunostained for PV (A) or CCK (B) to confirm neurochemical phenotype. Dendrites are in bold and axons in faint lines. Example neurobiotin staining shown top left for each interneuron type.
